# Supplementary material for: Essential transcription factors for induced neuron differentiation
Source: PubMed Central journal article supplement (PMC10724217; doi:10.1038/s41467-023-43602-7), 2023-12-15
Supplement: 41467_2023_43602_MOESM1_ESM.pdf [file 41467_2023_43602_MOESM1_ESM.pdf]

*Supplementary materials*

**Essential transcription factors for induced neuron differentiation**

Congyi Lu<sup>1,2,\*</sup>, Görkem Garipler<sup>2,\*</sup>, Chao Dai<sup>1,2,\*</sup>, Timothy Roush<sup>1,2</sup>, Jose Salome-Correa<sup>1,2</sup>, Alex Martin<sup>1,2</sup>, Noa Liscovitch-Brauer<sup>1,2</sup>, Esteban O. Mazzone<sup>2,‡,†</sup>, Neville E. Sanjana<sup>1,2,†</sup>

1. New York Genome Center, New York, NY, USA

2. Department of Biology, New York University, New York, NY, USA

\* Equal contribution.

‡ Present address: Department of Cell Biology, NYU Grossman School of Medicine, New York, NY USA

† Corresponding author: [eom204@nyu.edu](mailto:eom204@nyu.edu), [nsanjana@nyu.edu](mailto:nsanjana@nyu.edu)

## Supplementary Figures

**Supplementary Fig. 1.** A diverse set of transcription factors are expressed during neuronal differentiation.

**Supplementary Fig. 2.** Fluorescence activated cell sorting (FACS) gating strategy for MAP2-tdTomato reporter CRISPR screen.

**Supplementary Fig. 3.** Early time point guide RNA depletion and correlation between different induced neuron populations.

**Supplementary Fig. 4.** Gene expression and target site accessibility of neuron-essential transcription factors (neTFs).

**Supplementary Fig. 5.** Enhanced accessibility of the promoter region of *NEUROG2*, *POU3F2*, *VAX2* and *ZBTB18* upon activation of *NEUROG1/2*.

**Supplementary Fig. 6.** A mouse TFome-scale CRISPR screen in pluripotent cells to identify required TFs for *NEUROG1/2*-induced neuronal differentiation.

**Supplementary Fig. 7.** ZBTB18 expression during fetal development and genotyping of ZBTB18-null isogenic cell lines.

**Supplementary Fig. 8.** Gene expression and chromatin accessibility analyses in ZBTB18-null isogenic cell lines.

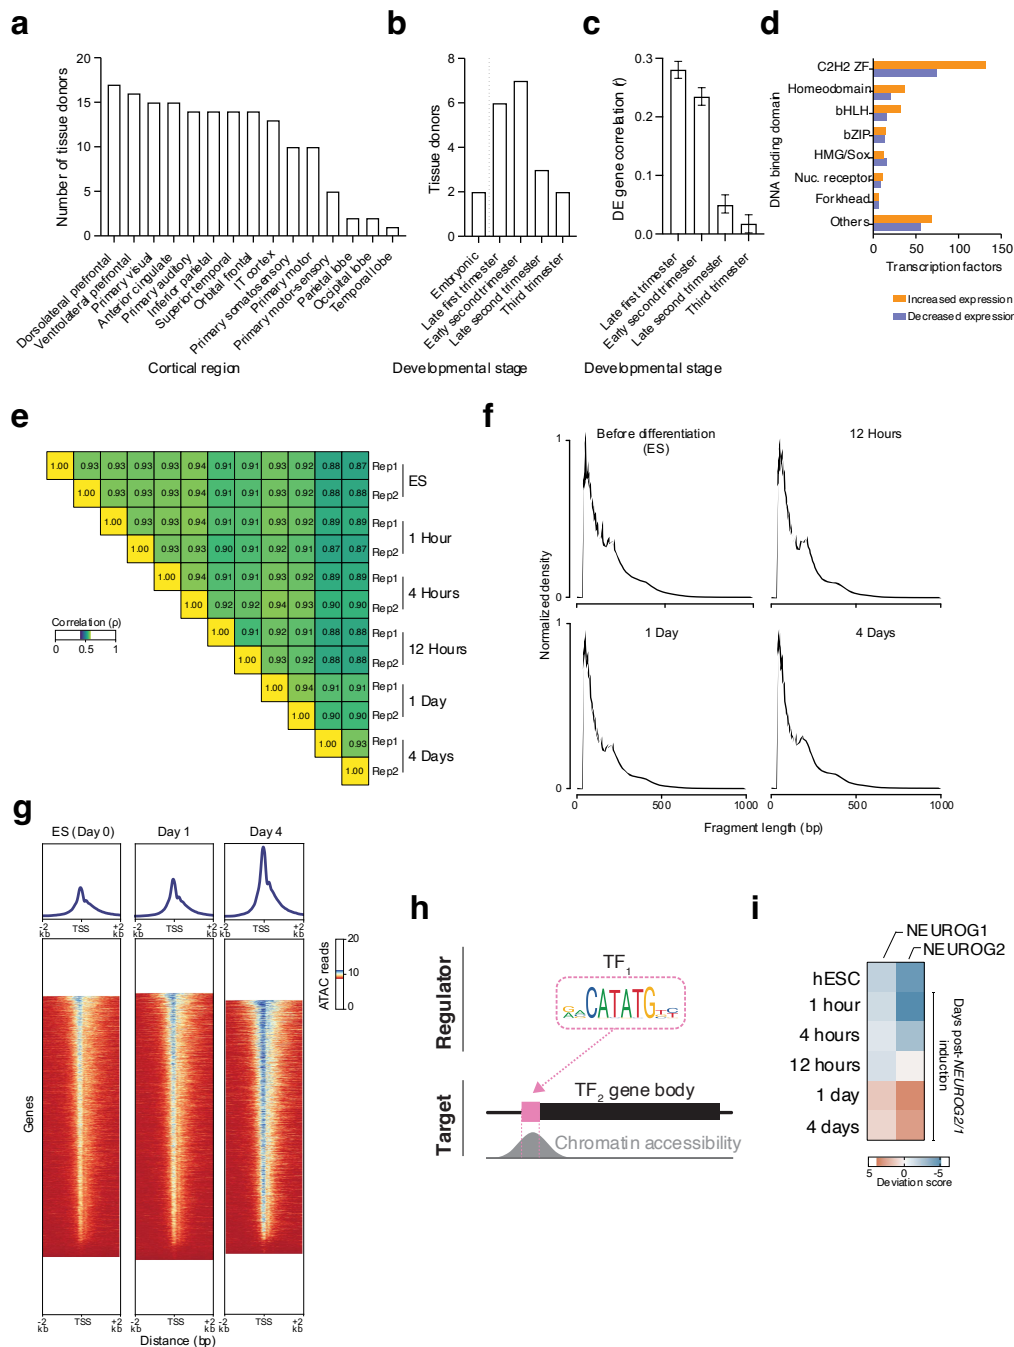

**Supplementary Figure 1. A diverse set of transcription factors are expressed during neuronal differentiation.** (a) Human fetal RNA-sequencing cortical regions used from the Allen Institute BrainSpan Developing Brain atlas. A total of 20 donors were analyzed with gene expression values averaged across all cortical regions available for each donor. (b) Human fetal RNA-sequencing donors by developmental stages. Embryonic: 3-9 weeks post-conception (wpc). Late first trimester: 10- 13 wpc. Early second trimester: 14 - 21 wpc. Late second trimester: 22 - 26 wpc.

Third trimester: more than 26 wpc. **(c)** Pearson correlation between differentially-expressed genes in differentiated human neurons (Day 7 vs. embryonic stem cells) and differentially-expressed genes in BrainSpan human fetal cortical regions (developmental stage indicated on the *x*-axis vs. cortical tissue from embryonic stage [3-9 wpc] donors). Bars indicate Pearson correlation (*r*) with 95% confidence interval error bars. **(d)** Transcription factors with a significant change (FDR < 0.05,  $|\log_2(\text{fold-change})| > 1$ ) in differential gene expression (Day 7 vs. ES) by DNA binding domain. **(e)** Spearman correlation between biological replicate ATAC-seq samples at different timepoints during iN differentiation (ES, 1 hour, 4 hour, 12 hour, 1 day and 4 day). **(f)** Sample insert lengths in ATAC-seq libraries display nucleosomal banding patterns. **(g)** ATAC-seq signal centered on 5000 gene promoters in Day 4 neurons. Each column is a separate biological replicate. **(h)** Motif identification strategy in the *cis*-regulatory region for each transcription factor to identify regulator-target interactions. Regulators motif were examined in the gene body (exons and introns) plus 2 kb upstream of the transcription start-site. **(i)** Accessibility of *NEUROG1* and *NEUROG2* motifs genome-wide at different timepoints using ChromVar analysis of ATAC-seq datasets <sup>71</sup>.

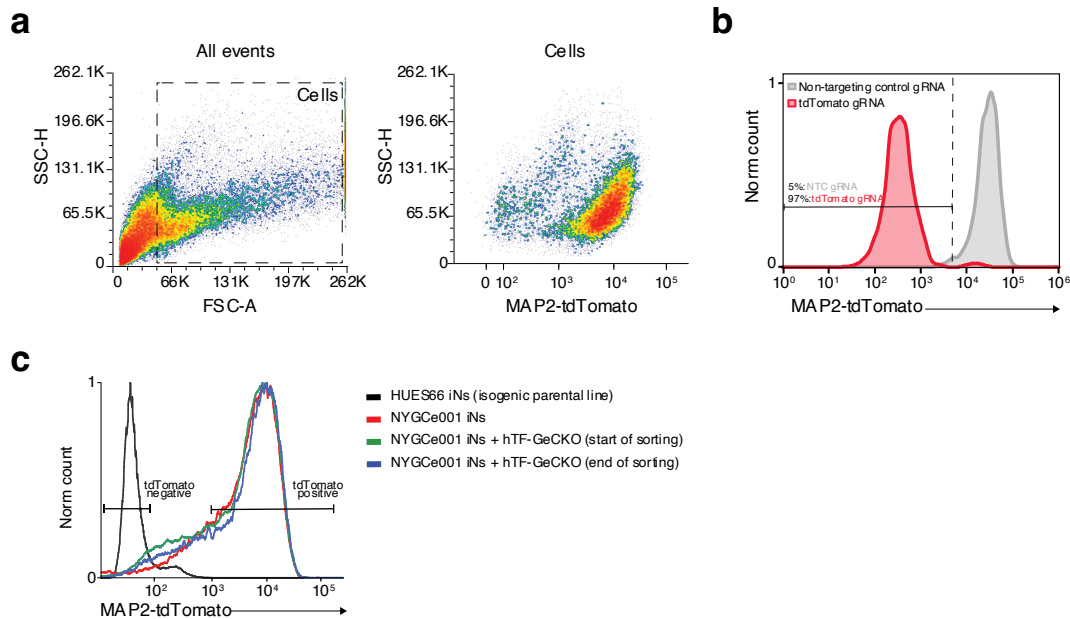

**Supplementary Figure 2. Fluorescence activated cell sorting (FACS) gating strategy for MAP2-tdTomato reporter CRISPR screen. (a) Gating for cells after *NEUROG1/2* induction. (b) MAP2-tdTomato fluorescence in *NEUROG1/2*-induced cells transduced with either a tdTomato-targeting or a non-targeting control (NTC) guide RNA. (c) MAP2-tdTomato fluorescence in *NEUROG1/2*-induced cells differentiated from HUES66, NYGCe001, or NYGCe001 transduced with the hTF-GeCKO library. For the NYGCe001 transduced with the hTF-GeCKO library, the population is shown at the beginning and at the end of the multi-hour sorting period. Gates for tdTomato-positive and tdTomato-negative populations used in the pooled CRISPR screen are shown.**

**a**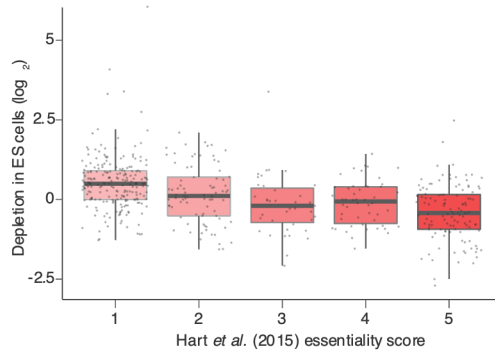**b**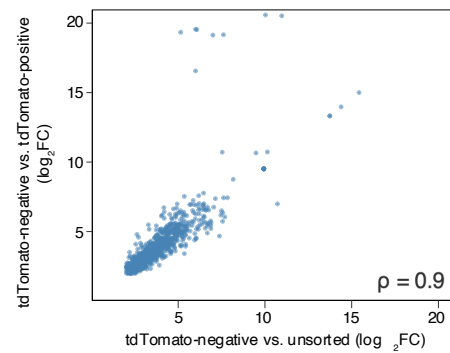

**Supplementary Figure 3. Early time point guide RNA depletion and correlation between different induced neuron populations. (a)** Depletion in NYGCE001 human embryonic stem cells at Day 7 of genes previously found to be essential in CRISPR screens<sup>73</sup>. The *x*-axis value indicates the number of cell lines where each gene was classified as essential in the Hart *et al.* dataset. **(b)** Correlation of guide RNAs in the tdTomato-negative vs. tdTomato-positive contrast and the tdTomato-negative vs. unsorted contrast.

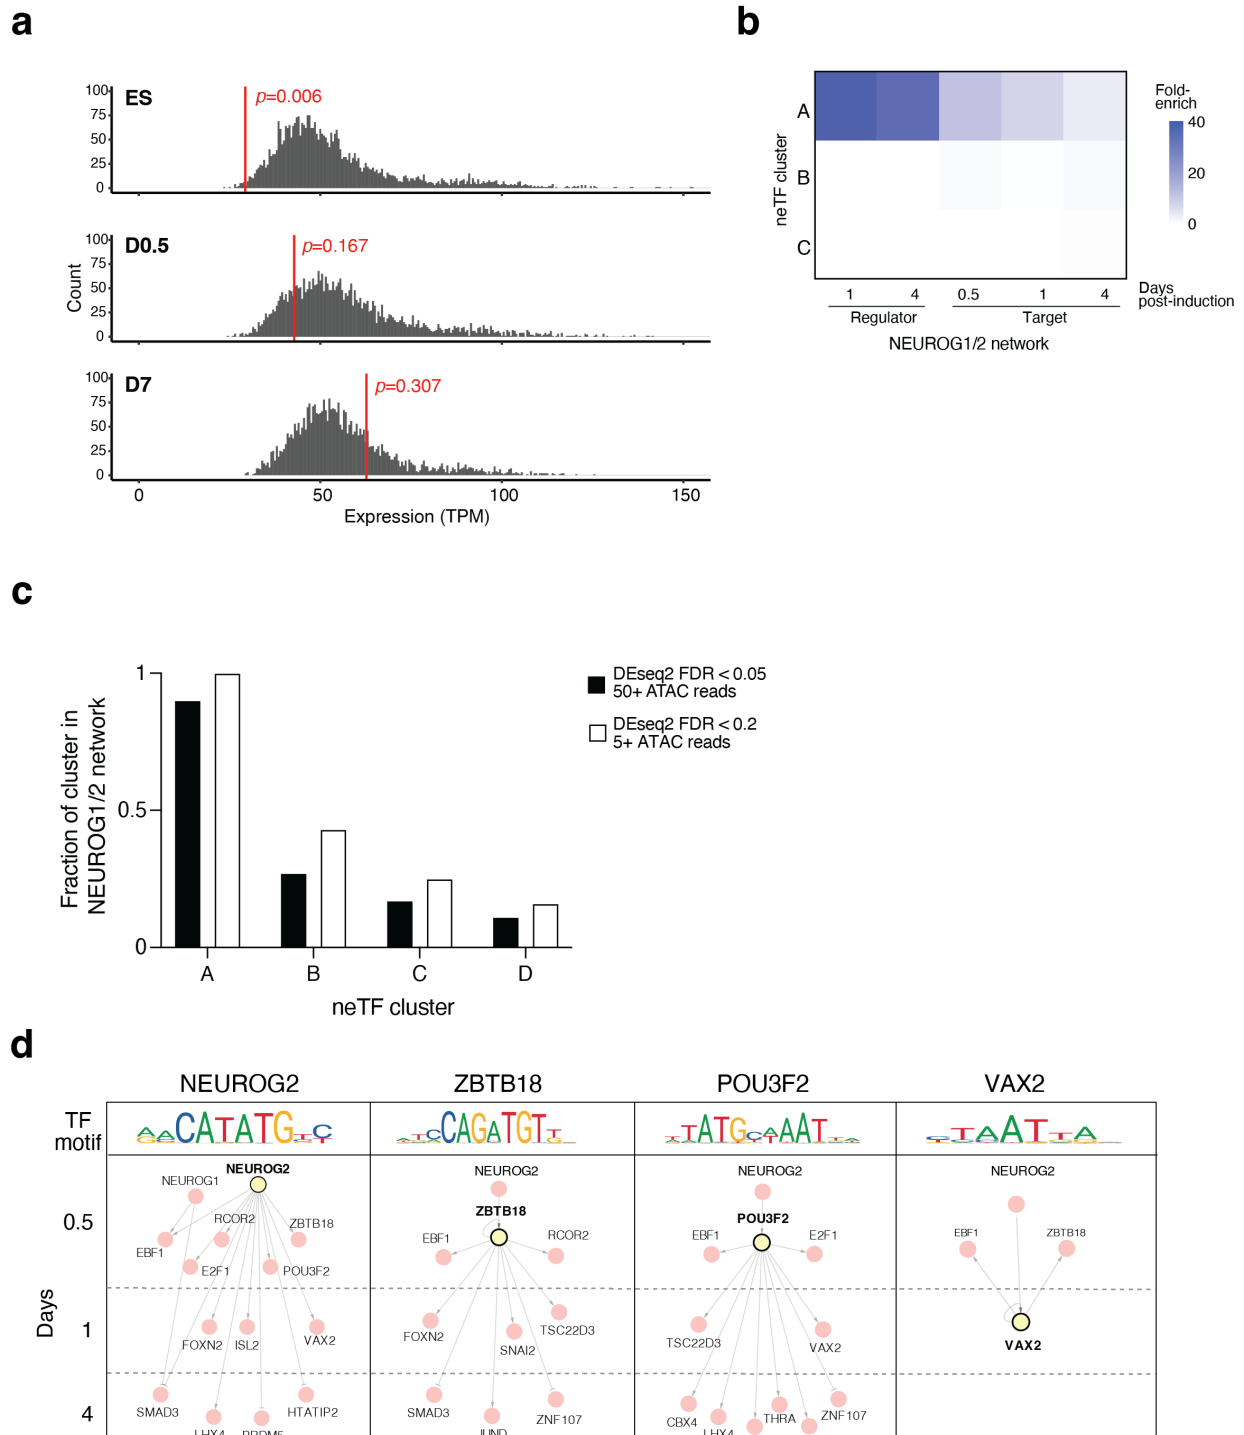

**Supplementary Figure 4. Gene expression and target site accessibility of neuron-essential transcription factors (neTFs).** (a) Histogram of TF expression at 3 different timepoints before or during *NEUROG1/2*-induced differentiation. Only expressed TFs are shown (RSEM count > 10). The mean expression of the 120 neTFs at 3 different timepoints before or during *NEUROG1/2*-induced differentiation (red line) is superimposed on each graph. We indicate the empirical probability of a randomly-chosen set of expressed TFs ( $n = 10,000$  random sets) having the same

mean expression as the neTFs. **(b)** Fold-enrichment for cluster A, B and C neTFs in regulator-TF or target-TF sets from *Figure 1D*. **(c)** Fraction of neTFs by cluster that are present in the NEUROG1/2 network as either a regulator-TF or target-TF using strict or relaxed criteria for TF network inclusion. For the networks shown in *Figure 1D*, we require target TFs to be differentially expressed (vs. stem cells) with a DEseq2 FDR  $< 0.05$  and regulator TFs of those target TFs to have their motifs in open chromatin regions with at least 50 ATAC reads (“strict criteria network”). Using more relaxed criteria (DEseq2 FDR  $< 0.2$ , ATAC reads  $> 5$ ), the resulting TF network is considerably more connected (575 nodes vs. 458 nodes in the strict criteria network, 8658 edges vs. 5517 edges in the strict criteria network). **(d)** The connections of NEUROG2, ZBTB18, POU3F2 (BRN2) and VAX2 to other neTFs.



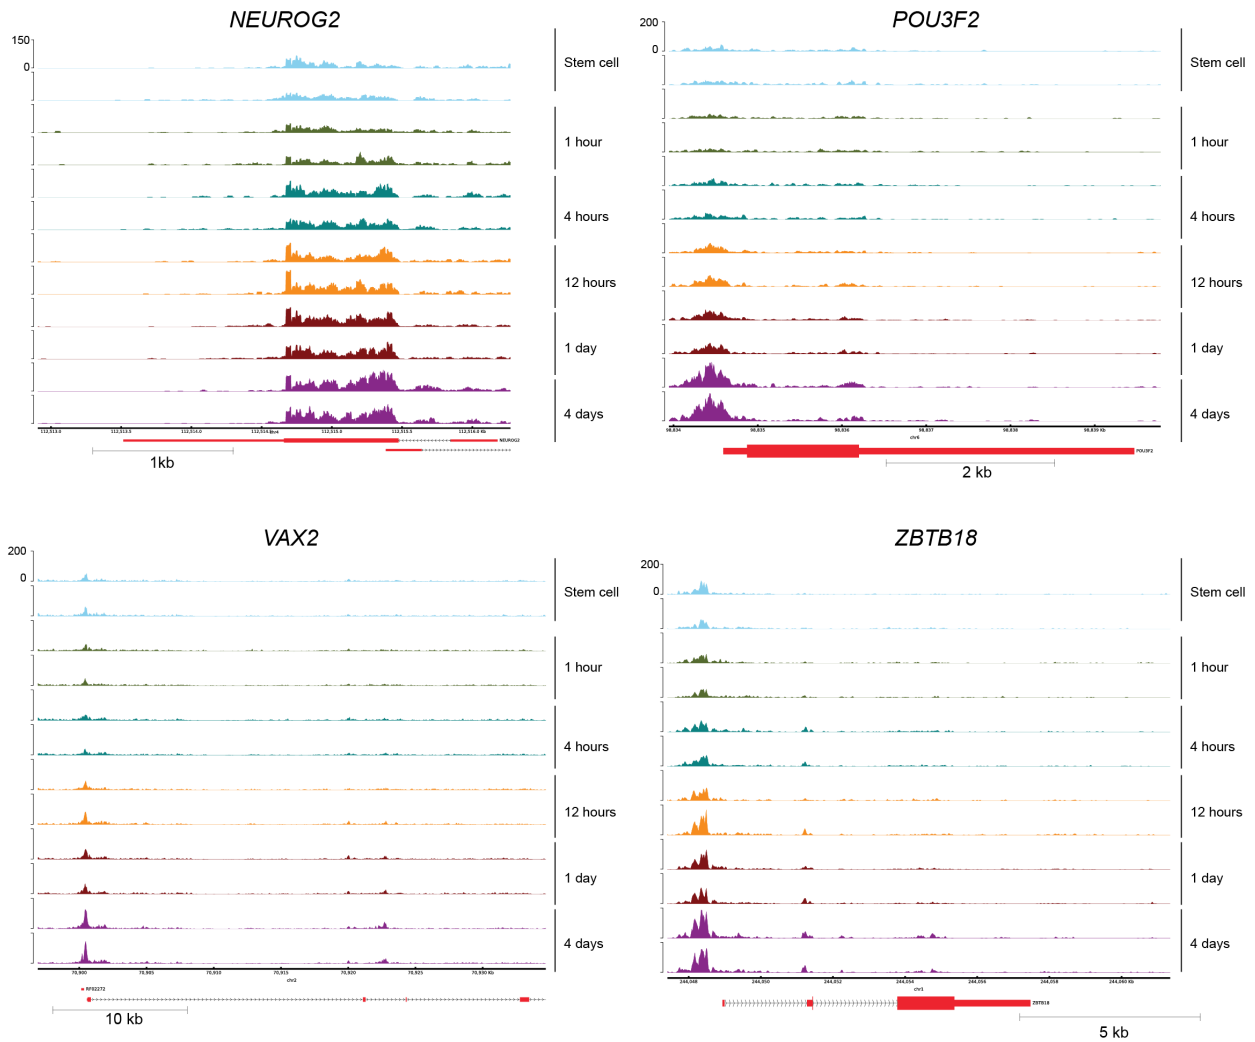

**Supplementary Figure 5. Enhanced accessibility of the promoter region of *NEUROG2*, *POU3F2*, *VAX2* and *ZBTB18* upon activation of *NEUROG1/2*.** ATAC reads mapping to human genome at 6 different timepoints before or during *NEUROG1/2*-induced differentiation shows enhanced accessibility of the promoter region of *NEUROG2*, *POU3F2*, *VAX2* and *ZBTB18* upon activation of *NEUROG1/2*. Two biological replicate ATAC-seq libraries are shown at each timepoint and for each track the y-axis is as indicated in the top track of the gene.

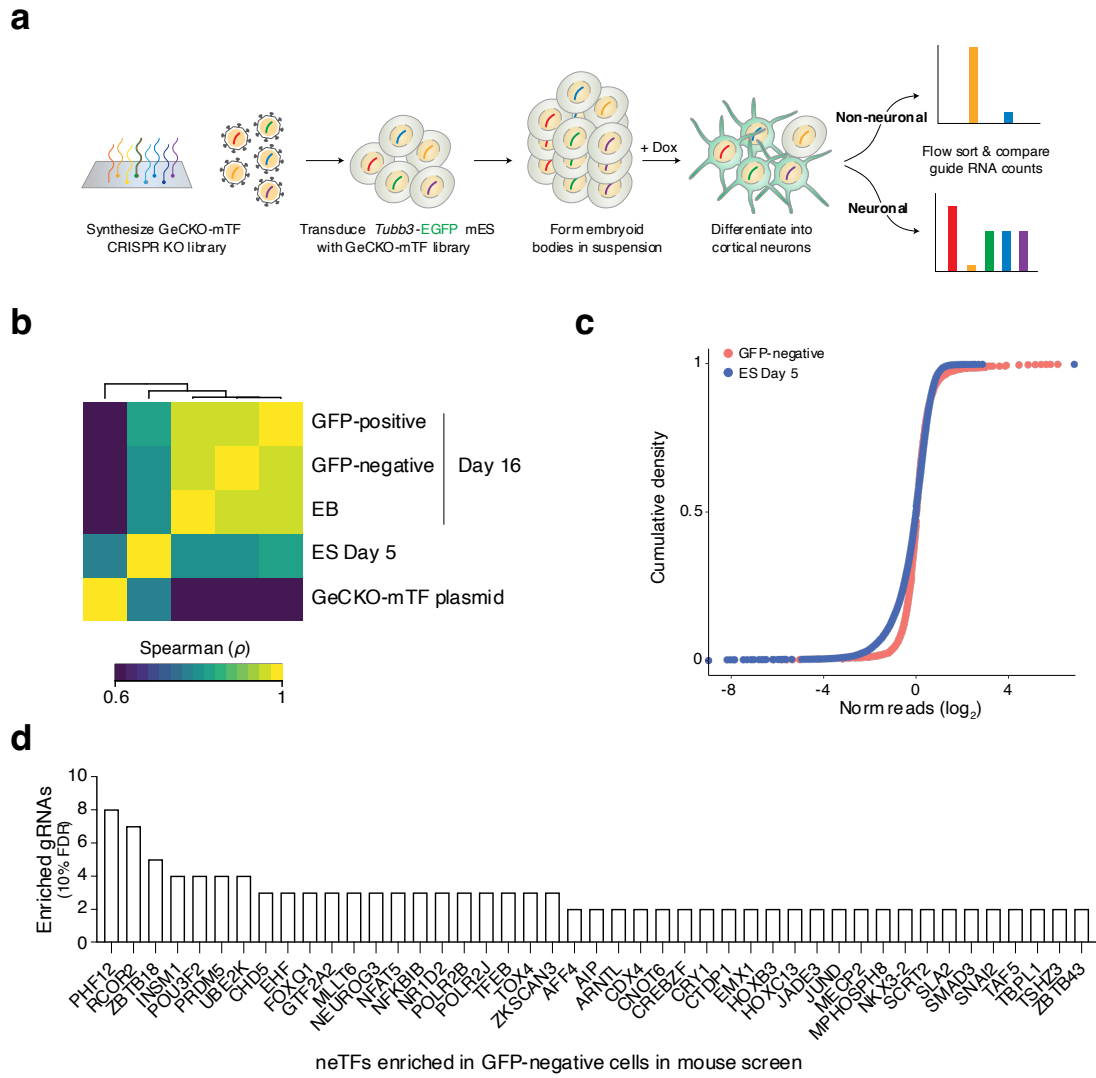

**Supplementary Figure 6. A mouse TFome-scale CRISPR screen in pluripotent cells to identify required TFs for NEUROG2-induced neuronal differentiation. (a)** Schematic of CRISPR screen targeting 1,682 mouse TFs with 10 guide RNAs each. **(b)** Spearman correlation between normalized read counts for each sample. ES: embryonic stem cell at early time point (Day 5). EB: embryoid body before sorting (Day 16). GFP-positive: EB sample after sorting for TUBB3-GFP-positive cells. GFP-negative: EB sample after sorting for TUBB3-GFP-negative cells. **(c)** Guide RNA representation for the ES cells and TUBB3-GFP-positive sorted populations. **(d)** Enriched guide RNAs for mouse neuron-essential TFs (enriched in the TUBB3-GFP-negative population, FDR < 0.1) that overlap neuron-essential TFs from the human CRISPR screen (Figure 2).

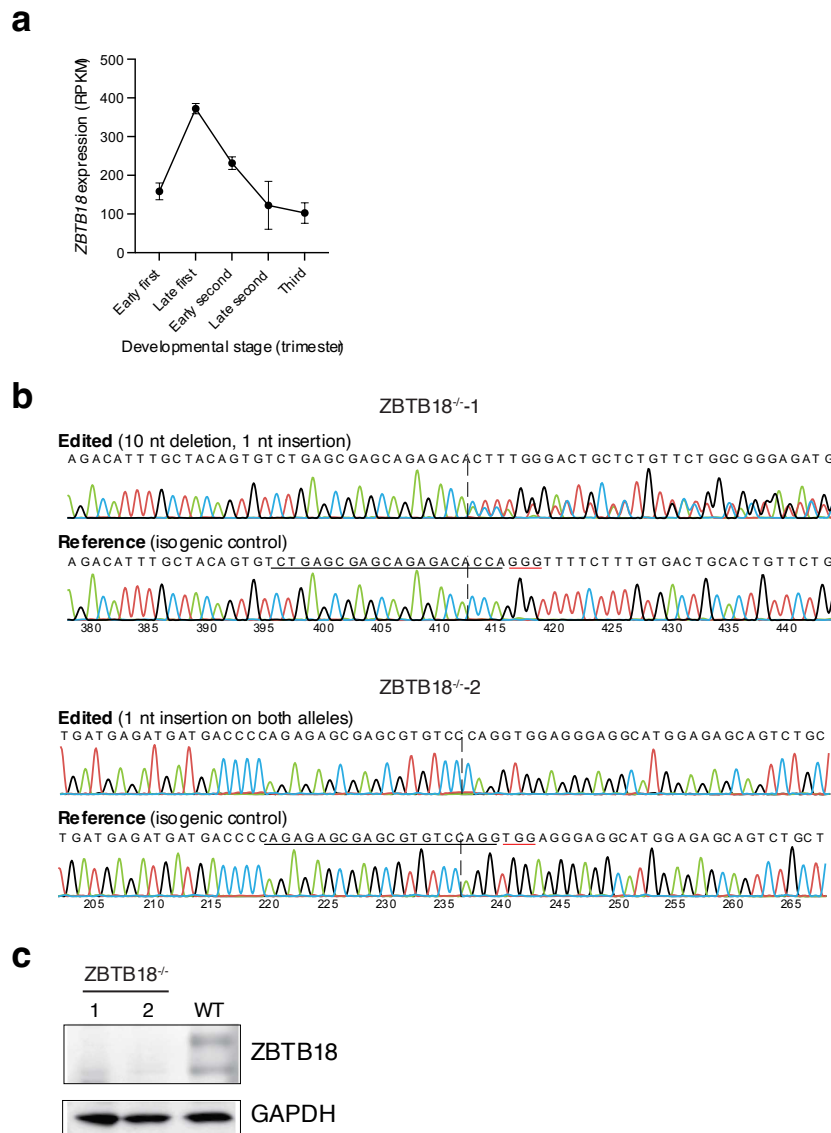

**Supplementary Figure 7. ZBTB18 expression during fetal development and genotyping of ZBTB18-null isogenic cell lines. (a)** *ZBTB18* expression in human fetal brain by developmental stage using RNA-sequencing from the Allen Institute BrainSpan Developing Brain Atlas. Early first trimester (embryonic): 3-9 weeks post-conception (wpc). Late first trimester: 10- 13 wpc. Early second trimester: 14 - 21 wpc. Late second trimester: 22 - 26 wpc. Third trimester: more than 26 wpc. Mean and standard error of *ZBTB18* expression in reads per kilobase per million (RPKM). For all donors, RPKM values are first averaged over all cortical regions (see *Figure S1A*). **(b)** Sanger sequencing of the ZBTB18-null cell lines (1 and 2) engineered using 2 different

guide RNAs. (c) Western blot analysis of ZBTB18-null cell lines (and isogenic parental cell line, WT) using a validated rabbit polyclonal ZBTB18 antibody<sup>30,31,74</sup>.

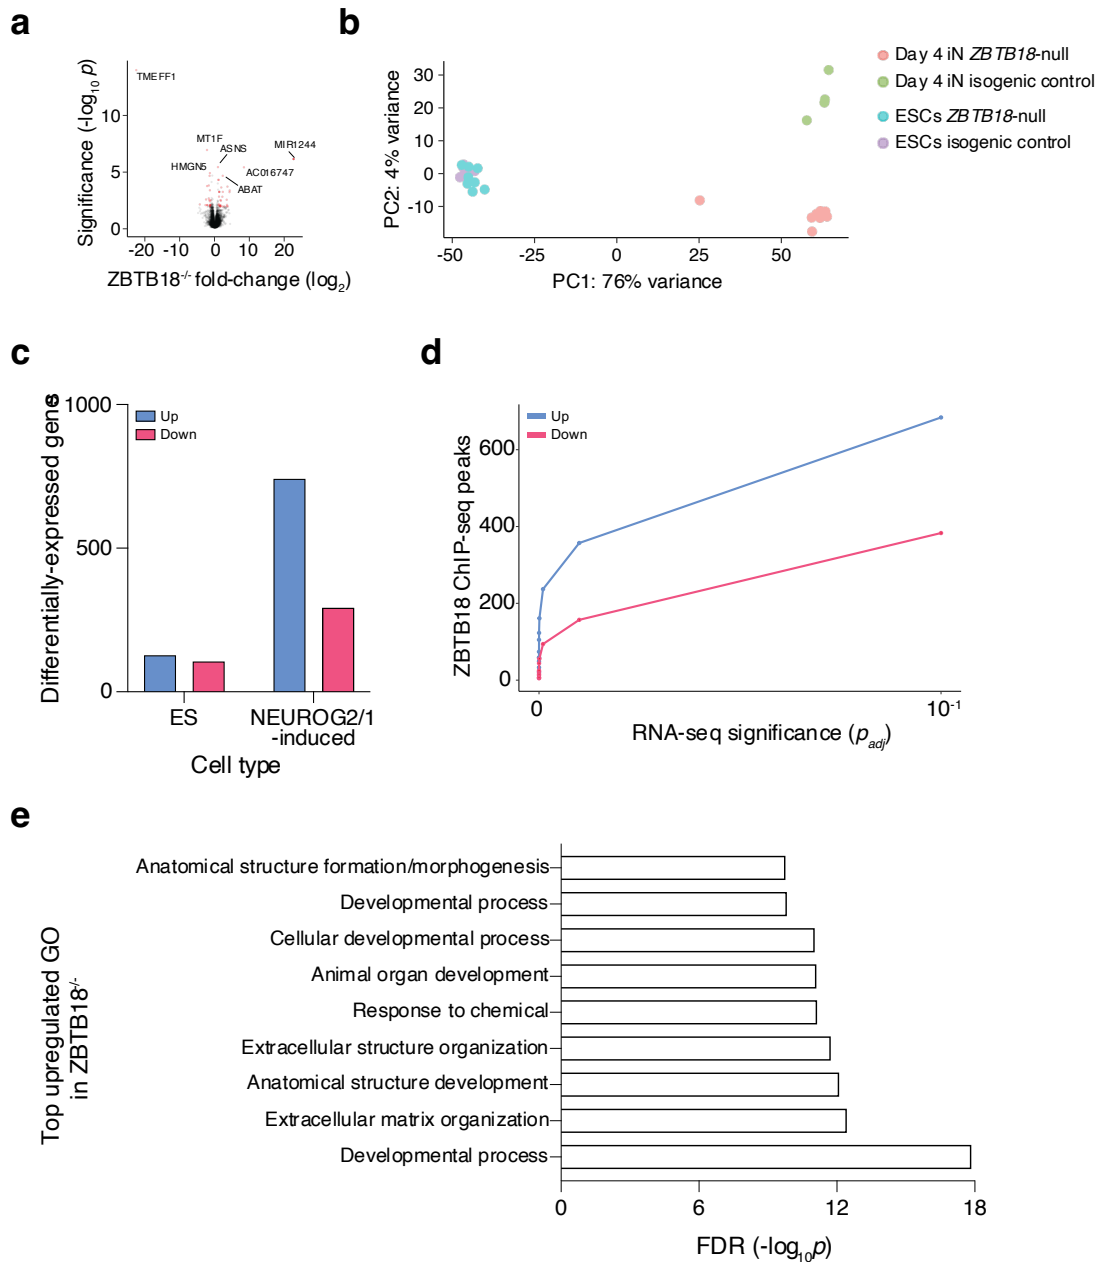

**Supplementary Figure 8. Gene expression and chromatin accessibility analyses in ZBTB18-null isogenic cell lines.** (a) Volcano plots for differential gene expression of ZBTB18-null pluripotent stem cells ( $n = 4$  replicates per genotype and timepoint). Red dots indicate genes with  $p_{adj} < 0.01$  and  $|\text{fold-change}| > 2$ . (b) Principal components analysis of gene expression in ZBTB18-null and parental isogenic (wild-type) control cell lines. Although the major source of variance (PC1) is cell state (pluripotent stem cell vs. induced neuron), PC2 captures a difference between genotypes (ZBTB18-null vs. wild-type) that is only found in the *NEUROG1/2*-induced cells and not in the pluripotent stem cells. (c) Number of differentially expressed genes ( $p_{adj} < 0.1$  and  $|\text{fold-}$

change| > 2) in ZBTB18-null and parental isogenic (wild-type) control cell lines in pluripotent stem cells and *NEUROG1/2*-induced cells. **(d)** Number of ZBTB18 ChIP-seq peaks where the closest gene is a significantly differentially expressed genes in ZBTB18-null vs. parental isogenic (wild-type) control cell lines. Data is shown for multiple gene expression (DEseq2) significance cut-offs from  $10^{-14}$  to  $10^{-1}$ . ZBTB18 ChIP-seq data is from GEO dataset GSM2026861 <sup>32</sup>. Up indicates genes with increased expression in ZBTB18-null differentiated cells and down indicates decreased expression in ZBTB18-null differentiated cells. **(e)** Top-ranked Gene Ontology categories in significantly upregulated genes in ZBTB18-null differentiated cells at day 4 after *NEUROG1/2*-induction.
