# Supplementary material for: Essential transcription factors for induced neuron differentiation
Source: PubMed Central journal article supplement (PMC10724217; doi:10.1038/s41467-023-43602-7), 2023-12-15
Supplement: 41467_2023_43602_MOESM2_ESM.pdf [file 41467_2023_43602_MOESM2_ESM.pdf]

## Description of Additional Supplementary Files

**File Name:** Supplementary Data 1

**Description:** RNA- and ATAC-seq library descriptions and sequencing reads. Sample and experiment type with the corresponding numbers of sequenced and mapped reads.

**File Name:** Supplementary Data 2

**Description:** Regulator and target genes. The regulator and target genes in the TF networks at different timepoints after *NEUROG1/2* induction.

**File Name:** Supplementary Data 3

**Description:** Human TF CRISPR screen normalized gRNA counts. Unique identifier and gene target for each guide RNA in the GeCKO-hTF (human) library and normalized gRNA counts from plasmid (Plasmid), hESCs at day 7 (D7\_ES), *NEUROG1/2*-induced cells at day 7 (D7\_neuron) and flow sorted MAP2-tdTomato positive (MAP2-pos) and negative (MAP2-neg) populations.

**File Name:** Supplementary Data 4

**Description:** Neuron-essential TFs (neTFs) and *k*-means cluster identity. Gene names and *k*-means cluster labels for the 120 neTFs.

**File Name:** Supplementary Data 5

**Description:** Mouse TF CRISPR screen normalized gRNA counts. Unique identifier and gene target for each guide RNA in the GeCKO-mTF (mouse) library and normalized gRNA counts from plasmid (Plasmid), mESCs at day 7 (ES\_D5), embryoid body (EmyBody), flow sorted TUBB3-GFP positive (GFPpos), and negative (GFPneg) populations.
